# Supplementary material for: Female Choice or Male Sex Drive? The Advantages of Male Body Size during Mating in Drosophila Melanogaster
Source: PLoS One. 2015 Dec 11;10(12):e0144672. doi: 10.1371/journal.pone.0144672 (PMC4676700; doi:10.1371/journal.pone.0144672)
Supplement: S5 Table — (XLSX) [file pone.0144672.s005.xlsx]

## Sheet: S5 Table
S5 Table Copulation interruption assays to test for female choice.
First Male: Small				First Male: Large
Trial Number	CAT1	Second male after copulation interruption	CAT2 (re-copulation)	Trial Number	CAT1	Second male after copulation interruption	CAT2 (re-copulation)
1	5.4	Small	1.2	1	2.3	Large	1.1
2	2.2	Small	4.1	2	2.1	Large	1.1
3	4.2	Small	2.2	3	3	Large	1.2
4	8.5	Small	2.1	4	5.5	Large	5.4
5	4.5	Small	1.2	5	3.3	Large	1.2
6	5.5	Small	3	6	4.2	Large	3
7	4	Small	2	7	5.1	Large	8
8	6	Small	1	8	4	Large	3
9	7.4	Small	2.2	9	5.1	Large	4
		Average	2.11111	10	2.1	Large	2.1
		STDEV	0.979087	11	4.5	Large	2.1
		STDERROR	0.326362	12	3.3	Large	2.2
10	3.2	Large	1.1	13	4.1	Large	4
11	3.3	Large	2.1	14	9.2	Large	2.2
12	11	Large	2.2	15	5.2	Large	4.2
13	5.2	Large	1.2	16	4.2	Large	2.2
14	4.2	Large	1.1	17	2.3	Large	1
15	5.3	Large	2	18	3	Large	1
16	4.2	Large	1			Average	2.72222
17	4.5	Large	2			STDEV	1.84791
18	7.3	Large	1.1			STDERROR	0.61597
19	6.3	Large	2.1	19	5.3	Small	1.4
20	9	Large	2.1	20	3.3	Small	5.5
21	4.5	Large	1.1	21	7.3	Small	1.2
22	4.3	Large	2.2	22	6.2	Small	2.2
23	8.3	Large	3	23	2.3	Small	1.2
24	4.3	Large	2.1	24	2.5	Small	3.3
25	6.3	Large	3.1	25	3.3	Small	3.2
26	2.5	Large	1.2	26	6.3	Small	2
27	5.3	Large	4.1	27	1.4	Small	2.1
28	4.3	Large	2.1	28	3.2	Small	2.2
29	6.3	Large	1.1	29	9.3	Small	2.4
30	2.4	Large	2.1	30	6.3	Small	2.4
Average	5.33333	Average	1.90952	Average	4.30667	Average	2.425
STDEV	2.16248	STDEV	0.803682	STDEV	2.00223	STDEV	1.17792
STDERROR	0.720828	STDERROR	0.267894	STDERROR	0.66741	STDERROR	0.392641
